# Supplementary material for: Effects of Health Anxiety, Social Support, and Coping on Dis-sociation with Mediating Role of Perceived Stress during the COVID-19 Pandemic
Source: Preprints.org preprint supplement (doi:10.20944/preprints202302.0108.v1), 2023-02-07
Supplement: Supplementary file 1 [file supplementary]

| **Table 1** Factor loadings for Hungarian version of WCQ | | | | | | | | |  |
| --- | --- | --- | --- | --- | --- | --- | --- | --- | --- |
|  | | Factor | | | | | | | |
|  | | 1 | | 2 | | 3 | | 4 | |
| item4 |  | 0.772 |  |  |  |  |  |  |  |
| item3 |  | 0.635 |  |  |  |  |  |  |  |
| item5 |  | 0.499 |  |  |  |  |  |  |  |
| item1 |  | 0.414 |  |  |  |  |  |  |  |
| item15 |  | 0.31 |  |  |  |  |  |  |  |
| item9 |  |  |  | 0.565 |  |  |  |  |  |
| item8 |  |  |  | 0.551 |  |  |  |  |  |
| item16 |  |  |  | 0.425 |  |  |  |  |  |
| item10 |  |  |  | 0.399 |  |  |  |  |  |
| item14 |  |  |  | 0.304 |  |  |  |  |  |
| item7 |  |  |  | .231 |  |  |  |  |  |
| item2 |  |  |  |  |  | 0.984 |  |  |  |
| item11 |  |  |  |  |  |  |  | 0.68 |  |
| item6 |  |  |  |  |  |  |  | 0.5 |  |
| item13 |  |  |  |  |  |  |  | 0.383 |  |
| item12 |  |  |  |  |  |  |  | 0.335 |  |

**Table 2** Descriptive statistics for variables of international sample

|  | Minimum | Maximum | Mean (SD) | α |  |
| --- | --- | --- | --- | --- | --- |
| DES | .00 | 100.00 | 20.374819.038) | .953 |  |
| DES amnesia | .00 | 100.00 | 13.012(17.517) | .882 |  |
| DES depersonalization | .00 | 100.00 | 14.859(20.687) | .871 |  |
| DES absorption | .00 | 100.00 | 33.251(25.087) | .899 |  |
| PSS | .00 | 4.00 | 2.287(.864) | .866 |  |
| SHAI | 1.00 | 3.44 | 1.939(.439) | .864 |  |
| MSPSS_others | 1.00 | 7.00 | 4.683(1.937) | .926 |  |
| MSPSS_family | 1.00 | 7.00 | 4.939(1.704) | .902 |  |
| MSPSS_friends | 1.00 | 7.00 | 4.701(1.725) | .925 |  |
| WCQ_wishfulthinking | .00 | 3.00 | 1.992(.703) | .750 |  |
| WCQ_goal-oriented | .00 | 3.00 | 1.876(.730) | .803 |  |
| WCQ_seeksupport | .00 | 3.00 | 1.325(796) | .808 |  |
| WCQ_thinkover | .00 | 3.00 | 1.676(.780) | .803 |  |
| WCQ_avoid | .00 | 3.00 | 1.548(.751) | .750 |  |

**Table 3** Descriptive statistics for variables of Hungarian sample

|  | Minimum | Maximum | Mean (SD) | α |
| --- | --- | --- | --- | --- |
| DES | .00 | 100.00 | 17.092(15.356) | .939 |
| DES amnesia | .00 | 85.00 | 10.259(13.720) | .830 |
| DES depersonalization | .00 | 96.00 | 10.833(16.772) | .861 |
| DES absorption | .00 | 100.00 | 30.134(21.528) | .877 |
| PSS | .07 | 4.00 | 2.129(.840) | .910 |
| SHAI | 1.00 | 4.00 | 1.929(.421) | .865 |
| MSPSS_others | 1.00 | 5.00 | 4.512(.914) | .908 |
| MSPSS_family | 1.00 | 5.00 | 3.82481.168) | .919 |
| MSPSS_friends | 1.00 | 5.00 | 4.126(1.101) | .935 |
| WCQ_humor | .00 | 3.00 | 1.700 (1.108) | - |
| WCQ_positive | .00 | 3.00 | 1.384(.743) | .708 |
| WCQ_distancing | .00 | 3.00 | .821(.549) | .530 |
| WCQ_outer_persepctive | .00 | 3.00 | 1.646(.702) | .606 |

**Table 4.** Correlation table – international sample

|  | 1 | 2 | 3 | 4 | 5 | 6 | 7 | 8 | 9 | 10 | 11 | 12 | 13 |
| --- | --- | --- | --- | --- | --- | --- | --- | --- | --- | --- | --- | --- | --- |
| 1 DES | - |  |  |  |  |  |  |  |  |  |  |  |  |
| 2 DES_amnesia | ,800*** | - |  |  |  |  |  |  |  |  |  |  |  |
| 3 DES_deperson | ,856*** | ,685*** | - |  |  |  |  |  |  |  |  |  |  |
| 4 DES_absorption | ,936*** | ,628*** | ,701*** | - |  |  |  |  |  |  |  |  |  |
| 5 Perceived stress | ,436*** | ,268*** | ,351*** | ,473*** | - |  |  |  |  |  |  |  |  |
| 6. SHAI | ,393*** | ,253*** | ,327*** | ,423*** | ,481*** | - |  |  |  |  |  |  |  |
| 7. MSPSS_others | -,139** | -,059 | -,197*** | -,107* | -,199*** | -,168*** | - |  |  |  |  |  |  |
| 8. MSPSS_family | -,171*** | -,116* | -,183*** | -,155*** | -,287*** | -,220*** | ,530*** | - |  |  |  |  |  |
| 9. MSPSS_friends | -,145*** | -,048 | -,180*** | -,119** | -,221*** | -,147*** | ,610*** | ,518*** | - |  |  |  |  |
| 10. WCQ_wishfulthink | ,413*** | ,262*** | ,351*** | ,443*** | ,480*** | ,411*** | -,025 | -,107* | -,006 | - |  |  |  |
| 11. WCQ_goal-oriented | -,061 | -,005 | -,069 | -,068 | -,283*** | -,095* | ,265*** | ,279*** | ,260*** | ,165*** | - |  |  |
| 12. WCQ_seeksupport | -,072 | ,049 | -,061 | -,104* | -,152*** | -,048 | ,462*** | ,383*** | ,479*** | ,053 | ,427*** | - |  |
| 13. WCQ_thinkover | ,106* | ,111* | ,099* | ,095* | -,145*** | ,073 | ,169*** | ,205*** | ,145*** | ,283*** | ,540*** | ,398*** | - |
| 14. WCQ_avoid | ,163*** | ,123** | ,160*** | ,125** | -,014 | -,011 | -,163*** | -,048 | -,126** | ,240*** | ,312*** | -,036 | ,293*** |

*: p<0.05; **: p<0.01; ***: p<0.001

**Table 5.** Correlation table – Hungarian sample

|  | 1 | 2 | 3 | 4 | 5 | 6 | 7 | 8 | 9 | 10 | 11 | 12 |
| --- | --- | --- | --- | --- | --- | --- | --- | --- | --- | --- | --- | --- |
| 1 DES | - |  |  |  |  |  |  |  |  |  |  |  |
| 2 DES_amnesia | ,809*** | - |  |  |  |  |  |  |  |  |  |  |
| 3 DES_deperson | ,818*** | ,603*** | - |  |  |  |  |  |  |  |  |  |
| 4 DES_absorption | ,952*** | ,684*** | ,682*** | - |  |  |  |  |  |  |  |  |
| 5 Perceived stress | ,450*** | ,340*** | ,372*** | ,438*** | - |  |  |  |  |  |  |  |
| 6. SHAI | ,316*** | ,213*** | ,278*** | ,304*** | ,437*** | - |  |  |  |  |  |  |
| 7. MSPSS_others | -,200*** | -,185*** | -,215*** | -,159*** | -,265*** | -,124*** | - |  |  |  |  |  |
| 8. MSPSS_family | -,285*** | -,244*** | -,245*** | -,265*** | -,395*** | -,222*** | ,526*** | - |  |  |  |  |
| 9. MSPSS_friends | -,158*** | -,121*** | -,186*** | -,125*** | -,274*** | -,208*** | ,562*** | ,481*** | - |  |  |  |
| 10.WCQ_humor | -,039 | -,031 | ,008 | -,053 | -,274*** | -,210*** | ,111*** | ,153*** | ,198*** | - |  |  |
| 11. WCQ_positive | -,078** | -,066* | -,042 | -,070* | -,400*** | -,241*** | ,235*** | ,329*** | ,269*** | ,444*** | - |  |
| 12. WCQ_distancing | ,322*** | ,240*** | ,296*** | ,307*** | ,367*** | ,247*** | -,095*** | -,153*** | -,050 | ,032 | ,002 | - |
| 13.WCQ_outer_pers | ,006 | -,005 | ,022 | ,010 | -,164*** | -,071* | ,228*** | ,200*** | ,297*** | ,259*** | ,468*** | ,137*** |

*: p<0.05; **: p<0.01; ***: p<0.001

**Table 6.** Regression model - Hungarian sample

| dependent variables | independent  variables | indirect effects | | direct effects | | index of moderated mediation |
| --- | --- | --- | --- | --- | --- | --- |
| measurement 1 | measurement 2 | measurement 1 | measurement 2 |
| absorption | SHAI | 3.930* (2.817; 5.253) | 4.617* (2.958; 6.441) | 5.890* (2.772; 9.008) | 7.044* (1.284; 12.083) | .687 (-1.012; 2.437) |
|  | MSPSS_others | -.000 (.283; -.565) | 4.617* (2.958; 6.441) | .197 (-.592; .989) | -.597 (-3.161; 1.968) | .197 (-.558; .971) |
|  | MSPSS_family | -1.149* (-1.590; -.732) | -.940* (-1.5656; -.316) | -2,322* (-3.597; -1.048) | -3,902* (-5,944; -1,859) | -.209 (-.384; .836) |
|  | MSPSS_friends | -.244 (-.738; .219) | -.824* (-1,486; -.165) | .627 (-.777; 2.032) | -.289 (-2,452; 1.875) | -.580 (-1.250; 0.057) |
|  | WCQ_humor | -.568* (-.980; -.192) | -.967* (-1.629; -.352) | .706 (-1,439; 2.850) | .104 (-1.108; 1.316) | -.400 (-1,095; .271) |
|  | WCQ_positive | -2.232* (-2.994; -1.538) | -2.470* (-3.594; -1.434) | 4.191* (2.157; 6.225) | 2.697 (-.581; 5.976) | -.238 (-1.243; .775) |
|  | WCQ_distancing | 3.949* (2.954; 5.007) | 3.637* (2.386; 5.016) | 4.887* (2.407; 7.367) | 5.678* (1.725; 9.632) | -.312 (-1.540; .968) |
|  | WCQ_outer_pers | .142 (-0.450; .748) | .053 (-.834; .939) | .7034 (-1.270; 2.677) | -1,856 (-5.215; 1.503) | -.089 (-1.077; .903) |
| depersonalization | SHAI | 1.834* (1.174; 2.595) | 2.155* (1.239; 3.254) | 4.984* (2,499; 7.470) | 5.311* (.720; 9.902) | .321 (-.497; 1.167) |
|  | MSPSS_others | 0.000 (-.258; .271) | 0.092 (-.279; .482) | -2,042* (-3.449; -0.635) | -2,611* (-4.655; -0.567) | 0.092 (-.275; .476) |
|  | MSPSS_family | -.536* (-.788; -.313) | -.438* (-.764; -.149) | -1.414* (-2.430; -.397) | -2.034* (-3.663; -0.405) | .098 (-0.188; .402) |
|  | MSPSS_friends | -.114 (-0.359; .110) | -.385* (-.722;-.069) | .068 (-1.052; 1.187) | -.195 (-1.920; 1.530) | -.271 (-.606; .415) |
|  | WCQ_humor | -.265* (-.479; -.084) | -.452* (-.782; -.154) | .715 (-.251; 1.681) | 1.061 (-.649; 2.770) | -.186 (-.512; .139) |
|  | WCQ_positive | -1.042* (-1.493; -.637) | -1,153 (-1.783; .607) | 2,354* (.732; 3.976) | 2,115 (-.499; 4.729) | -.111 (-.608;.381) |
|  | WCQ_distancing | 1.849* (1.216; 2.556) | 1.703* (1.019; 2,525) | 4,091* (2.117; 6.065) | 7.481* (4.334; 10.628) | -,146 (-.765; .464) |
|  | WCQ_outer_pers | .066 (-.221; .369) | .025 (-.388; .452) | .802 (-1.200; 1.949) | 1.366 (-2.928; 2.430) | -,041 (-.515; .444) |
| amnesia | SHAI | 1.576* (.980; 2.336) | 1,851* (1.068; 2.839) | 1,768 (-.364; 3.901) | 1.136 (-2.803; 5.075) | .275 (-.415; .986) |
|  | MSPSS_others | 0.000 (-.240; .226) | .079 (-.250; .406) | -0.722 (-1,928; .485) | -1.864* (-3,617; .-.111) | 0.079 (-.231; .410) |
|  | MSPSS_family | -.460* (-.681; -,269) | -.377* (-.674; -.132) | -1.155* (-2.027; -2.083) | -1,993* (-3.390;-.596) | .0838 (-.167; .339) |
|  | MSPSS_friends | -,097 (-0.301; 0.096) | -.328* (-.623; -.064) | .484 (-.477; 1.444) | -,341 (-1.821; 1.138) | -,231 (-0.516; .028) |
|  | WCQ_humor | -.229* (-.415; -.077) | -.390* (-.694; -.133) | .183 (.665; -.646) | 1.435 (-.030; 2.901) | -.161 (-.4709; .106) |
|  | WCQ_positive | -.893* (-1.296; -.543) | -.989* (-1.572; -.511) | 1.770* (.379; 3.162) | 1.211 (-1.032; 3,453) | -.095 (-.552; .326) |
|  | WCQ_distancing | 1.580* (1.020; 2.215) | 1.456* (.854; 2.179) | 3.092* (1.396; 4.788) | 3.373* (.669; 6.077) | -.125 (-.667; .398) |
|  | WCQ_outer_pers | .057 (-.193; .308) | .021 (-,334; .407) | -.473 (-1.824; .877) | -1.282 (-3.5809; 1.016) | -.035 (-.441; .372) |
| Dissociation sum | SHAI | 2.447* (1.688; 3.293) | 2.875* (.582; 4.092) | 4.214* (1.989; 6.440) | 4.4969* (.386; 8.607) | .427 (-.651; 1.557) |
|  | MSPSS_others | -.000 (-.349; .353) | .122 (-,373; .611) | -..892 (-2.151; .368) | -1.691 (-3,52; .139) | .123 (-.358; .591) |
|  | MSPSS_family | -.715* (-1.004; -.458) | -.585* (-.993; -.195) | -1.630* (-2,540; -.721) | -2.643* (-4.101; -1.185) | .130 (-.258;.536) |
|  | MSPSS_friends | -.151 (-.445; .144) | -.512* (-.930; -.110) | .392 (-.609; 1.395) | -.275 (-1.819; 1.269) | -.361 (-.776; .030) |
|  | WCQ_humor | -.354* (-.625; -.113) | -.603* (-1.035; -.222) | .334 (-.531; 1.199) | 1.067 (-.463; 2.598) | -.249 (-.702; .168) |
|  | WCQ_positive | -1.389* (-1.900; -.935) | -1.537* (-2.268; -.868) | 2.772 (1.320; 4.224) | 2.008 (-.332; 4,348) | -.148 (-.798; .523) |
|  | WCQ_distancing | 2.459* (1.787; 3.177) | 2.265* (1.467; 3.180) | 4,023* (2.254; 5,793) | 5,511* (2.690; 8.331) | -,194 (-1.009; .590) |
|  | WCQ_outer_pers | .088 (-.287; .456) | .033 (-.548; .609) | .202 (-1.207; 1.611) | -1,129 (-3.527; 1,269) | -.055 (-.672; .577) |

*: effects significantly different from 0, based on 95% confidence interval

**Table 7.** Regression model - International sample

| dependent  variables | independent  variables | indirect effects | | direct effects | | index of moderated mediation |
| --- | --- | --- | --- | --- | --- | --- |
| measurement 1 | measurement 2 | measurement 1 | measurement 2 |
| absorption | SHAI | 3.841* (1.963; 5.974) | 3.304* (1.157; 6.103) | 9.230* (3.532; 14.928) | 19.143* (10.651; 27.636) | -.537 (-2.802; 1.822) |
|  | MSPSS_others | .079 (-.213; .381) | -.087 (-.597; .420) | .043 (-1.376; 1,462) | .697 (-1.370; 2.765) | -.166 (-.730; .369) |
|  | MSPSS_family | -.167 (-.546; .164) | -.380 (-.996; .159) | .2938 (-1.210; 1.798) | 1.300 (-.978; 3.578) | -.213 (-.836; .340) |
|  | MSPSS_friends | -.420* (-.830; -.067) | -.574* (-1.254; -.018) | -.205 (-1.792; 1.382) | 1.379 (-.994; 3.752) | -.153 (-.792; .482) |
|  | WCQ_wishfulthinking | 3.628* (2.010; 5.093) | 5.1169* (2.720; 7.976) | 8.604* (4.659; 12.550) | 5.835* (.524; 11.147) | 1,488* (.121; 3.353) |
|  | WCQ_goal-oriented | -2.561* (-4.038; -1.299) | -.678 (-2.118;.515) | -1.765 (-5.691; 2.161) | 2.682 (-8,164; 2.377) | 1.883* (.524; 3.508) |
|  | WCQ_seeksupport | .735 (-.048; 1.598) | .255 (-.791; 1.397) | -3.924* (-7.353; -.494) | 2.451 (-9,0807; .552) | -.480 (-1.749; .771) |
|  | WCQ_thinkover | -1.472* (-2.597; -.622) | -.939 (-2.273; .234) | 4.187 (.694; 7.680) | 5.244 (-.014; 10.502) | .533 (-.793; 2.036) |
|  | WCQ_avoid | -.087 (-.839; .722) | -.006 (-1.056; 1.219) | 3.575* (.269; 6.882) | -4.392 (-1.056; 1.219) | .081 (-1.224; 1.455) |
| depersonalization | SHAI | 1.393* (.080; 2.913) | 1.198­* (.046; 2.888) | 6.512* (1.340; 11.683) | 3.923* (6,111; 21.527) | -.195 (-1.186; .779) |
|  | MSPSS_others | .029 (-.086; .161) | -.031 (-.248; .174) | -.732 (-2.019; .555) | -,394 (-2.268; 1.480) | -.060 (-.309; .151) |
|  | MSPSS_family | -.060 (-.251; .051) | -.137 (-.456; .053) | .281 (-1.083; 1.645) | .771 (-1.295; 2.837) | -.077 (-.370; .132) |
|  | MSPSS_friends | -.152 (-.374; .003) | -.207 (-.522; .029) | -.918 (-2.357; .521) | .054 (-2.098; 2.206) | -.055 (-.311; .206) |
|  | WCQ_wishfulthinking | 1.410* (.136; 2.710) | 1.988* (.189; 3.863) | 6.189* (2.624; 9.754) | 1.139 (-3.660; 5.938) | .578 (-.010; 1.511) |
|  | WCQ_goal-oriented | -.930* (-1.939; -,037) | -.246 (-1.007; .193) | -2.143 (-5.701; 1.415) | -2.963 (-7.740; 1.813) | .683 (.004; 1.578) |
|  | WCQ_seeksupport | .264 (-.041; .725) | .092 (-.319; .641) | .225 (-2.883; 3.333) | 2.221 (-4.254; 4.477) | -.173 (-.763; .335) |
|  | WCQ_thinkover | -.532* (-1.219; -.033) | -,339 (-.969; .103) | 2.121 (-1.045; 5,287) | 1.749 (-3,017; 6.515) | .193 (-.285; .909) |
|  | WCQ_avoid | -.031 (-.358; .304) | -.002 (-.504; .474) | 4,226* (1.211; 7.240) | .258 (-4.131; 4.648) | .029 (-.552; .570) |
| amnesia | SHAI | 1.417* (.373; 2.709) | 1.219* (.244; 2.571) | 4.507 (-.022; 9.036) | 9,654* (2.904; 16.404) | -.198 (-1.172; .684) |
|  | MSPSS_others | .029 (-.082; .154) | -.032 (-.237; .160) | -.135 (-1.260; .991) | -.641 (-2.280; .998) | -,061 (-.300; .136) |
|  | MSPSS_family | -.061 (-.220; .055) | -.139 (-.421; .056) | .041 (-1.152; 1,235) | .053 (-1,754; 1.861) | -,077 (-.334; .133) |
|  | MSPSS_friends | -.152* (-.338; -.014) | -.207 (-.487; .009) | .420 (-.839; 1.679) | -.474 (-2.357; 1.409) | -.055 (-.294; .192) |
|  | WCQ_wishfulthinking | 1.401* (.454; 2.457) | 1.975* (.631; 3.547) | 2.809 (-.314; 5.931) | -.765 (-4.969; 3.439) | .575* (.015; 1.431) |
|  | WCQ_goal-oriented | -.959* (-1.744; -.260) | -.254 (-.936; .179) | -1.278 (-4.390; 1.834) | -2.443 (-6.621; 1.735) | .705* (.124; 1.444) |
|  | WCQ_seeksupport | .270 (-.014; .693) | .094 (-.317; .564) | 1.486 (-1.232; 4.205) | 1.407 (-2.412; 5.225) | -.177 (-.742; .266) |
|  | WCQ_thinkover | -.552* (-1.146; -.119) | -,352 (-.976; .078) | 2,724 (-.043; 5,490) | .485 (-3,679; 4.650) | .200 (-.300; .836) |
|  | WCQ_avoid | -.032 (-.339; .271) | -.002 (-.452; .455) | 3.633* (.992; 6.273) | 1,129 (-2,716; 4.973) | .030 (-.496; .571) |
| Dissociation sum | SHAI | 2.217* (.998; 3.695) | 1.907* (.583; 3.790) | 6.750* (2.199; 11.300) | 14.205* (7.423; 20.987) | -.310; (-.634; 1.081) |
|  | MSPSS_others | -.125 (.046; .233) | -.050 (-.357; .247) | -.274 (-1.407; .859) | -,112 (-1.763; 1.538) | -.096 (-.439; .225) |
|  | MSPSS_family | -,096 (-.328; .084) | -,219 (-.587; .087) | ,205 (-.995; 1,406) | .708 (-1.111; 2,527) | -,122 (-.495; .210) |
|  | MSPSS_friends | -.241* (-.500; -.035) | -.330 (-.730; .005) | -.234 (-1.503; 1.034) | .320 (-1,577; 2.216) | -,088 (-.456; .300) |
|  | WCQ_wishfulthinking | 2,146* (1.025; 3,424) | 3,027* (1.440; 4.886) | 5,867* (2.724; 9,011) | 2,070 (-2.162; 6.301) | .880* (.059; 1.962) |
|  | WCQ_goal-oriented | -1.484* (-2.449; -.655) | -.393 (-1.330; .316) | -1.729 (-4.862; 1.405) | -2.767 (-6.973; 1.440) | 1.091* (.262; 2.098) |
|  | WCQ_seeksupport | .423 (-.016; 1.009) | .147 (-.453; .869) | -,737 (-3,475; 3.000) | -.915 (-4,760; 2.929) | -.276 (-1.056; .484) |
|  | WCQ_thinkover | -.852* (-1.567; -.307) | -.543 (-1.352; .141) | 3.011* (.222; 5.799) | 2.493 (-1.704; 6.690) | .309 (-.462; 1.238) |
|  | WCQ_avoid | -.050 (-,496; .427) | -,003 (-.646; .706) | 3,811* (1.162; 6,460) | -1.001 (-4,858; 2.855) | ,047 (-.731; .813) |

*: effects significantly different from 0, based on 95% confidence interval

**Table 8.** Coefficients of the linear regression of the Hungarian sample

|  | dependent variables | | | | | | | | | | | | | | | | | |
| --- | --- | --- | --- | --- | --- | --- | --- | --- | --- | --- | --- | --- | --- | --- | --- | --- | --- | --- |
|  |  | Perceived stress | |  |  | Absorption | |  |  | Depersonalization | |  |  | Amnesia | |  | Dissociation | | |  |
| independent variable | Coeff | | SEa | | Coeff | | SEa | | Coeff | | SEa | | Coeff | | SEa | | Coeff | SEa | |
| Perceived stress | - | | - | | 8.611*** | | .842 | | 4.019*** | | .671 | | 3.453*** | | .576 | | 5.361*** | .601 | |
| SHAI | .456*** | | .53 | | 5.890*** | | 1.589 | | 4.985*** | | 1.267 | | 1.768 | | 1.087 | | 4.214*** | 1.134 | |
| MSPSS_others | -.093 | | .028 | | .089 | | .833 | | -2.189** | | .664 | | -1.005 | | .570 | | -1.096 | .595 | |
| MSPSS_family | -.127*** | | .020 | | -2.675*** | | .602 | | -1.552** | | .480 | | -1.343** | | .412 | | -1.857*** | 0.430 | |
| MSPSS_friends | -.044 | | .023 | | .416 | | .666 | | .007 | | .531 | | .295 | | .456 | | .239 | .475 | |
| WCQ_humor | -.076*** | | .019 | | .228 | | .560 | | .789 | | .446 | | .460 | | .383 | | 0.492 | 0.400 | |
| WCQ_pos | -.264*** | | .032 | | 3.880*** | | .964 | | 2.307** | | .768 | | 1.636* | | .659 | | 2.608*** | .688 | |
| WCQ_avoid | .448*** | | .036 | | 5,092*** | | 1.112 | | 4.982*** | | .886 | | 3.168*** | | .761 | | 4.414*** | .794 | |
| WCQ_out | .014 | | .032 | | .140 | | .921 | | .237 | | .734 | | -.650 | | .630 | | -0,091 | .657 | |
| Constant | 2.036*** | | .155 | | -.968 | | 4.81 | | -.758 | | 3.836 | | 3.285 | | 3.291 | | .520 | 3.434 | |
|  | R2 = .411  F(10,1186) = 82.65*** | | | | R2 = .244  F(11,1185) = 34.836*** | | | | R2 = .199  F(11,1185) = 26.818*** | | | | R2 = .130  F(11,1185) = 16.067*** | | | | R2 = .244  F(11,1185) = 38.685*** | | |

*: effects significantly different from 0, based on 95% confidence interval

**: effects significantly different from 0, based on 99% confidence interval

***: effects significantly different from 0, based on 99.9% confidence interval

**Table 9.** Coefficients of the linear regression of the International sample

|  | dependent variables | | | | | | | | | | | | | | | | | |
| --- | --- | --- | --- | --- | --- | --- | --- | --- | --- | --- | --- | --- | --- | --- | --- | --- | --- | --- |
|  |  | Perceived stress | |  |  | Absorption | |  |  | Depersonalization | |  |  | Amnesia | |  | Dissociation | | |  |
| independent variable | Coeff | | SEa | | Coeff | | SEa | | Coeff | | SEa | | Coeff | | SEa | | Coeff | SEa | |
| Perceived stress | - | | - | | 7.310*** | | 1.483 | | 2.651* | | 1.346 | | 2.697* | | 1.178 | | 4.219*** | 1.184 | |
| SHAI | .525*** | | .087 | | 9.230** | | 2.900 | | 6.512* | | 2.632 | | 4.507 | | 2.305 | | 6.750** | 2.316 | |
| MSPSS_others | .005 | | .020 | | .173 | | .658 | | -.674 | | .597 | | -.290 | | .523 | | -.264 | .525 | |
| MSPSS_family | -.031 | | .021 | | .616 | | .689 | | .453 | | .626 | | .075 | | .548 | | .381 | .551 | |
| MSPSS_friends | -.063** | | .023 | | .147 | | .748 | | -.706 | | .679 | | .190 | | .595 | | -.123 | .598 | |
| WCQ_wishful | .560*** | | .050 | | 7.512*** | | 1.800 | | 4.465** | | 1.634 | | 1.589 | | 1.431 | | 4.522** | 1.438 | |
| WCQ_goaloriented | -.274*** | | .054 | | -2.248 | | 1.779 | | -2,496 | | 1.615 | | -1.708 | | 1.414 | | -2.151 | 1.421 | |
| WCQ_seeksupport | .079 | | .049 | | -3.597* | | 1.571 | | .506 | | 1.426 | | 1.684 | | 1.249 | | -.469 | 1.255 | |
| WCQ_avoid | -.010 | | .046 | | 1.398 | | 1.466 | | 3.191* | | 1.331 | | 2.176 | | 1.293 | | 2.893* | 1.299 | |
| WCQ_thinkover | -.186 | | .050 | | 4.464** | | 1.627 | | 2.039 | | 1.477 | | 2.991* | | 1.165 | | 2.527* | 1.171 | |
| Constant | 1.310*** | | .219 | | -23.218** | | 7.325 | | -14.271* | | 6.649 | | -13.786* | | 5.822 | | -17.091** | 5.850 | |
|  | R2 = .456  F(11,471) = 35,910*** | | | | R2 = .334  F(12,470) = 19.643*** | | | | R2 = .193  F(12,470) = 9.373*** | | | | R2 = .137  F(12,470) = 6.217*** | | | | R2 = .262  F(12,470) = 13.936*** | | |

*: effects significantly different from 0, based on 95% confidence interval

**: effects significantly different from 0, based on 99% confidence interval

***: effects significantly different from 0, based on 99.9% confidence interval
